RESEARCH ARTICLE

# Gut microbiota markers in early childhood are linked to farm living, pets in household and allergy

Annika Ljung<sup>1</sup>\*, Monica Gio-Batta<sup>1</sup>, Bill Hesselmar<sup>2</sup>, Henrik Imberg<sup>3,4</sup>, Hardis Rabe<sup>1</sup>, Forough L. Nowrouzian<sup>1</sup>, Susanne Johansen<sup>5</sup>, Carl-Johan Törnåge<sup>2,6</sup>, Gunhild Lindhagen<sup>7</sup>, Margareta Ceder<sup>8</sup>, Anna-Carin Lundell<sup>9</sup>, Anna Rudin<sup>9</sup>, Agnes E. Wold<sup>1</sup>, Ingegerd Adlerberth<sup>1</sup>

**1** Department of Infectious Diseases, Institute of Biomedicine, Sahlgrenska Academy, University of Gothenburg, Gothenburg, Sweden, **2** Department of Paediatrics, Institute of Clinical Sciences, Sahlgrenska Academy, University of Gothenburg, Gothenburg, Sweden, **3** Statistiska Konsultgruppen, Gothenburg, Sweden, **4** Department of Molecular and Clinical Medicine, Institute of Medicine, Sahlgrenska Academy, University of Gothenburg, Gothenburg, Sweden, **5** Pediatric Clinic, Skaraborg Hospital, Lidköping, Sweden, **6** Pediatric Clinic, Skaraborg Hospital, Skövde, Sweden, **7** Pediatric Clinic, Skaraborg Hospital, Falköping, Sweden, **8** Pediatric Clinic, Vara Clinical Center, Vara, Sweden, **9** Department of Rheumatology and Inflammation Research, Institute of Medicine, Sahlgrenska Academy, University of Gothenburg, Gothenburg, Sweden

\* These authors contributed equally to this work.

\* [annika.m.ljung@vgregion.se](mailto:annika.m.ljung@vgregion.se)

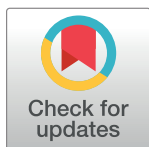

## OPEN ACCESS

**Citation:** Ljung A, Gio-Batta M, Hesselmar B, Imberg H, Rabe H, Nowrouzian FL, et al. (2024) Gut microbiota markers in early childhood are linked to farm living, pets in household and allergy. PLoS ONE 19(11): e0313078. <https://doi.org/10.1371/journal.pone.0313078>

**Editor:** Rajeev Singh, Satyawati College, University of Delhi, INDIA

**Received:** May 24, 2024

**Accepted:** October 17, 2024

**Published:** November 27, 2024

**Copyright:** © 2024 Ljung et al. This is an open access article distributed under the terms of the [Creative Commons Attribution License](https://creativecommons.org/licenses/by/4.0/), which permits unrestricted use, distribution, and reproduction in any medium, provided the original author and source are credited.

**Data Availability Statement:** The full dataset underlying the results of the present study cannot be made publicly available since it contains 'pseudonymized sensitive personal data' and is subject to restrictions because of its sensitive nature. It contains data on a small group of research participants, and it cannot be excluded that combining data for several variables used in the analyses would make it possible to identify individual participants. It furthermore contains information about individuals and their health within research. This information is subject to

## Abstract

### Background

Children growing up on farms or with pets have a lower risk of developing allergy, which may be linked to their gut microbiota development during infancy.

### Methods

Children from the FARMFLORA birth cohort (N = 65), of whom 28 (43%) lived on a dairy farm and 40 (62%) had pets, provided fecal samples at intervals from 3 days to 18 months of age. Gut microbiota composition was characterized using quantitative microbial culture of various typical anaerobic and facultatively anaerobic bacteria, with colonization rate and population counts of bacterial groups determined at the genus or species level. Allergy was diagnosed at three and eight years of age by experienced pediatricians. Generalized estimating equations were used to identify associations between farm residence or pet ownership, gut microbiota development and allergy. Adjustments were made for important potential confounders.

### Results

Growing up on a farm was associated with a higher ratio of anaerobic to facultative bacteria in the first week, smaller *Escherichia coli* populations in colonized children in the first months of life and less frequent colonization by *Clostridioides difficile* at 12 months of age. Having pets in the household was associated with more frequent colonization by *Bifidobacterium*, *Lactobacillus* and *Bacteroides* in the first months. A higher ratio of anaerobic to facultative

specific national confidentiality regulations (Public Access to Information and Secrecy Act, SFS 2009:400, [https://www.riksdagen.se/sv/dokument-och-lagar/dokument/svensk-forfattningssamling/offentlighets-och-sekretesslag-2009400\\_sfs-2009-400/](https://www.riksdagen.se/sv/dokument-och-lagar/dokument/svensk-forfattningssamling/offentlighets-och-sekretesslag-2009400_sfs-2009-400/)), and also to the General Data Protection Regulation (GDPR), 2016/679, <https://www.imy.se/en/organisations/data-protection/this-applies-according-to-gdpr/>.

**Funding:** This work was supported by the Region Västra Götaland (agreement concerning medical research and education – ALF), <https://www.alfvastragotland.se> [ALFGBG966243] [ALFGBG720181] (IA); the Swedish Medical Research Council (Vetenskapsrådet), <https://www.vr.se/> [K98-06X-12612-01A] (AW); and the Health & Medical Care Committee of the Region Västra Götaland (Regional Research & Development funds Västra Götaland region) <https://www.researchweb.org/is/vgregion/> [grant no. VGFOUREG-12007] (IA). The funders had no role in study design, data collection and analysis, decision to publish, or preparation of the manuscript.

**Competing interests:** The authors have declared that no competing interests exist.

bacteria at one week of age, early colonization by *Bifidobacterium*, *Lactobacillus* and *Bacteroides*, and reduced carriage of *C. difficile* at 4–12 months of age all correlated negatively with subsequent allergy diagnosis.

## Conclusions

Our findings indicate that lower rates of allergy in children growing up on farms or with pets may be related to early establishment of typical anaerobic commensals in their gut microbiota. However, further studies are needed to validate our observations in this small birth cohort study.

## Introduction

Children growing up on farms have low rates of allergic diseases [1, 2]. One of several possible explanations may relate to early contact with microbes in the farming environment [3], which may become established in the infant's commensal microbiota and stimulate programming of the immune system towards a tolerogenic phenotype during the crucial early development window [4]. However, detailed studies comparing the gut colonization patterns of farmers' infants and non-farmers' infants from the very first weeks of life are lacking. By one year of age, farmers' infants have a more mature gut microbiota than infants from non-farming families, as assessed using 16S rRNA gene sequencing [5], and the gut microbiota of farm children is enriched in certain putative *Eubacterium* species at 5–13 years of age [6]. Furthermore, gut microbiota maturation by one year of age correlates negatively with the development of asthma or allergy [5, 7–9] and the effect of certain farm exposures on hay fever is mediated in part by microbiota richness at one year of age [10]. Children who are growing up with pets are also less likely than others to develop allergy [11–13], possibly through similar mechanisms.

Gut microbiota acquisition and maturation represent a sequential process. Facultative anaerobic bacteria ("facultatives"), i.e. bacteria that prefer an oxygen-rich milieu but also replicate under anaerobic conditions, are the first to establish in the gut. These include staphylococci, enterococci, *Escherichia coli* and other *Enterobacteriaceae* species. As they thrive and reach high population counts, they gradually consume most of the oxygen in the neonatal gut. Obligate anaerobic bacteria ("anaerobes") cannot utilize oxygen, and while some anaerobes can tolerate low levels of oxygen, many die upon contact with air. Thus, colonization by anaerobes starts with relatively oxygen-tolerant groups such as bifidobacteria, *Bacteroides* and certain *Clostridium* species. Subsequently, oxygen-sensitive genera are progressively established, forming a complex, highly anaerobic gut microbiota [14]. In this competitive milieu, facultative bacteria thrive less well, and their population levels decline [15–17]. The anaerobe *Clostridioides difficile*, which is a common gut colonizer in infants, is also outcompeted by a complex anaerobic microbiota [18]. Thus, a mature gut microbiota is characterized by a high ratio of anaerobes to facultatives, low population counts of various facultative anaerobes, and a paucity of *C. difficile*.

The FARMFLORA birth cohort included children from dairy farms and rural control children in South-West Sweden, many of whom had pets in the household. Consistent with the allergy-protective 'farm effect', children from farming families had a lower rate of allergy than the control children at three years of age, although not at eight years [19, 20]. Here, we characterized the gut microbiota composition of FARMFLORA children from birth to 18 months of age using quantitative microbial culture methods [21]. Quantitative microbial culture permitted detection at the genus or species level of many anaerobic and facultative bacterial groups

that are characteristic inhabitants of the infant gut, including *Bifidobacterium*, *Bacteroides*, *Lactobacillus*, *Clostridium*, *C. difficile* and *E. coli* [14]. Importantly, as quantitative information on gut microbiota development in early life is limited [22], it also allowed the absolute abundance (population counts) of bacterial groups to be determined. We then described the patterns of acquisition and development of the gut microbiota in relation to exposure to a farming milieu and living with pets, and with respect to subsequent allergy development.

## Materials and methods

### The FARMFLORA cohort

The FARMFLORA birth cohort included 28 children from dairy farming families and 37 non-farming controls born at term ( $\geq 38$  gestational weeks) in a rural area of southwest Sweden [19]. Recruitment took place in the period 14<sup>th</sup> September 2005 - 3<sup>rd</sup> March 2008. The characteristics of the cohort are shown in Table 1, with further supporting information on antibiotic treatment in S1 Table. The study was approved by the Human Research Ethics Committee, University of Gothenburg, Sweden (Dnr. 363–05, 674–14) and all the parents provided written informed consent.

### Collection of samples and metadata

The gut microbiota of the children was sampled on nine occasions from 3 days to 18 months of age, as previously described [21]. Freshly voided feces were collected by the parents at 1, 2

**Table 1. Characteristics of the FARMFLORA cohort and comparisons between children exposed, or not exposed, to farm living or pets, and between children with or without allergy at 3 or 8 years of age.**

| Child characteristics                    | Total cohort (n = 65) | Raised on a farm |             |         | Pets in household <sup>a</sup> |             |         | Allergy at 3 years <sup>c,d</sup> |             |         | Allergy at 8 years <sup>c,e</sup> |             |         |
|------------------------------------------|-----------------------|------------------|-------------|---------|--------------------------------|-------------|---------|-----------------------------------|-------------|---------|-----------------------------------|-------------|---------|
|                                          |                       | Yes (N = 28)     | No (N = 37) | p-value | Yes (N = 40)                   | No (N = 24) | p-value | Yes (N = 11)                      | No (N = 52) | p-value | Yes (N = 10)                      | No (N = 38) | p-value |
| Farming family                           | 28 (43)               |                  |             |         | 21 (52)                        | 7 (29)      | 0.077   | 1 (9)                             | 26 (50)     | 0.02    | 3 (30)                            | 15 (39)     | 0.72    |
| Pets in household <sup>a</sup>           | 40 (62)               | 21 (75)          | 19 (53)     | 0.077   |                                |             |         | 5 (46)                            | 34 (67)     | 0.30    | 5 (56)                            | 22 (58)     | 1.00    |
| Vaginal delivery                         | 55 (85)               | 25 (89)          | 31 (84)     | 0.49    | 33(82)                         | 21 (88)     | 0.73    | 7 (64)                            | 46 (89)     | 0.06    | 6 (60)                            | 33 (87)     | 0.08    |
| Exclusively breastfed at 4 months        | 34 (52)               | 17 (61)          | 17 (46)     | 0.32    | 19 (48)                        | 14 (58)     | 0.45    | 2 (18)                            | 30 (58)     | 0.02    | 3 (30)                            | 23 (61)     | 0.15    |
| Partially breastfed at 12 months         | 33 (51)               | 14 (50)          | 19 (53)     | 1.00    | 17 (44)                        | 15 (62)     | 0.20    | 2 (18)                            | 29 (57)     | 0.04    | 2 (20)                            | 23 (61)     | 0.03    |
| Firstborn                                | 29 (45)               | 10 (35)          | 19 (51)     | 0.31    | 19 (47)                        | 9 (37)      | 0.60    | 5 (45)                            | 24 (46)     | 1.00    | 7 (70)                            | 17 (45)     | 0.29    |
| Intrapartum antibiotics <sup>b</sup>     | 10 (15)               | 2 (7)            | 8 (22)      | 0.17    | 6 (15)                         | 4 (17)      | 1.00    | 4 (36)                            | 6 (12)      | 0.06    | 5 (50)                            | 5 (13)      | 0.02    |
| Antibiotics at 0–6 months <sup>b</sup>   | 11 (17)               | 6 (21)           | 5 (13)      | 0.50    | 7 (17)                         | 4 (17)      | 1.00    | 1 (10)                            | 10 (20)     | 0.67    | 2 (22)                            | 6 (16)      | 0.65    |
| Antibiotics at 6–12 months <sup>b</sup>  | 11 (17)               | 5 (18)           | 6 (16)      | 1.00    | 5 (12)                         | 6 (25)      | 0.30    | 3 (27)                            | 7 (14)      | 0.36    | 4 (40)                            | 4 (11)      | 0.047   |
| Antibiotics at 12–18 months <sup>b</sup> | 17 (26)               | 8 (29)           | 9 (24)      | 0.77    | 10 (25)                        | 7 (29)      | 0.77    | 5 (46)                            | 12 (24)     | 0.26    | 4 (44)                            | 10 (26)     | 0.42    |
| Girl                                     | 32 (48)               | 18 (64)          | 14 (38)     | 0.046   | 19 (47)                        | 12 (50)     | 1.00    | 2 (18)                            | 28 (54)     | 0.046   | 4 (40)                            | 21 (55)     | 0.49    |
| Allergic parent(s)                       | 27 (41)               | 8 (29)           | 19 (51)     | 0.079   | 12 (30)                        | 14 (58)     | 0.036   | 7 (64)                            | 20 (39)     | 0.18    | 5 (50)                            | 15 (39)     | 0.72    |
| Allergy at 3 years <sup>c,d</sup>        | 11 (17)               | 1 (4)            | 10 (27)     | 0.017   | 5 (13)                         | 6 (26)      | 0.30    |                                   |             |         | 5 (50)                            | 4 (11)      | 0.01    |
| Allergy at 8 years <sup>c,e</sup>        | 10 (21)               | 3 (17)           | 7 (23)      | 0.72    | 5 (19)                         | 4 (20)      | 1.00    | 5 (56)                            | 5 (13)      | 0.01    |                                   |             |         |

Data are presented as numbers (percentages). Comparisons between groups were performed using Fisher's exact test.

<sup>a</sup> Information regarding pets (cat and/or dog) in household was missing for one child not raised on a farm.

<sup>b</sup> See S1 Table for further details on patterns of antibiotic use.

<sup>c</sup> Data regarding allergy at three and eight years of age in relation to other cohort characteristics have been published previously [19, 20, 23].

<sup>d</sup> 63 children (97%) were examined for allergy at three years of age.

<sup>e</sup> 48 children (74%) were examined for allergy at eight years of age.

<https://doi.org/10.1371/journal.pone.0313078.t001>

and 4 weeks and 2, 4, 6, 12 and 18 months, and transported to the laboratory in air-tight bags filled with an anaerobic atmosphere (AnaeroGen Compact, Oxoid Ltd, Basingstoke, UK). In addition, rectal swab samples were collected by staff at the maternity unit at 3 days of age. Both fecal and rectal swab samples were cultured within 24h after collection.

Parental allergy and pets in the household were registered upon inclusion [19]. Feeding pattern was registered by the parents and collected by telephone interviews at infants' age 6 12 and 18 months [23].

### Gut microbiota composition by quantitative microbial culture

Gut microbiota composition was characterized using quantitative microbial culture, according to a methodology detailed in [S1 Appendix](#), which we have also described previously [21]. In overview, multiple combinations of culture media (9x), growth conditions (2x), and identification methodologies (9x) were used to determine the colonization (presence/absence) and abundance (population counts, CFU/g feces) of various anaerobic or facultative bacterial groups, including many known to dominate in the infant gut microbiota. As expressed at the level of identification (genus/species/other), these comprised: (anaerobes) *Bifidobacterium*, *Bacteroides*, *Lactobacillus*, *Clostridium*, *C. difficile*; (facultatives) *Staphylococcus aureus*, coagulase-negative staphylococci (CoNS), *Enterococcus*, *E. coli* and other *Enterobacteriaceae* (*Klebsiella*, *Enterobacter*, *Citrobacter*, *Proteus*, *Morganella*, *Raultella*, *Pantoea*, *Hafnia*). Of note, gut colonization by *S. aureus* in this cohort has been described in detail elsewhere [24].

In brief, fecal samples were serially diluted in sterile peptone water using a calibrated spoon and each dilution was plated onto a range of non-selective and selective media then incubated under aerobic or anaerobic conditions ([S1 Appendix](#)). Bacterial isolates were sub-cultured for purity and identified using biochemical and/or genetic methods ([S1 Appendix](#)) [21, 25, 26]. For each sample, the presence/absence of each bacterial group was recorded, and its population count determined from agar plates yielding 10–100 free-lying colonies. The detection limit was 330 ( $10^{2.52}$ ) colony-forming units (CFU)/g feces. Rectal swab samples were cultured on non-selective and selective media as described above although under aerobic conditions only. The presence/absence of facultative bacterial groups was recorded, but due to the non-quantitative nature of swab sampling population counts were not determined.

For each sample, metrics for analysis were the presence/absence of each bacterial group and its population count (CFU/g of feces; measured in colonized children only). In addition, the ratio of population counts of anaerobic to facultative bacteria (anaerobic/facultative ratio) was determined, as a measure of the anaerobic character of the microbiota. The ratio was determined for all samples in which total population counts of both anaerobic and facultative bacteria could be calculated (based on visible growth on the non-selective culture media Brucella blood and Colombia blood agar, respectively).

### Diagnosis of allergy

The children were examined for atopic eczema, asthma, allergic rhinoconjunctivitis, and food allergy by experienced pediatricians at three and eight years of age using set diagnostic criteria ([Table 2](#)) [19, 20]. Allergy was defined as having one or more of these diagnoses. As previously reported, 11/63 (17%) children received a doctor's diagnosis of allergy at three years of age [19]. At eight years of age, 10/48 (21%) children were allergic ([Table 2](#)) [20]. Of these, five were also allergic at three years of age and did not grow out of their allergy, and five became allergic after three years of age. Four children who were allergic at age three were no longer allergic at age 8 and two were lost to follow-up.

**Table 2. Criteria used for the diagnosis of atopic eczema, asthma, allergic rhinoconjunctivitis, and food allergy in the FARMFLORA birth cohort, and numbers of children diagnosed at three and eight years of age.**

| Diagnosis                    | Diagnostic criteria                                                                                                                                                                                                                                                                                                                                                                                                                                                                                                                                                                                                       | Number diagnosed |                |
|------------------------------|---------------------------------------------------------------------------------------------------------------------------------------------------------------------------------------------------------------------------------------------------------------------------------------------------------------------------------------------------------------------------------------------------------------------------------------------------------------------------------------------------------------------------------------------------------------------------------------------------------------------------|------------------|----------------|
|                              |                                                                                                                                                                                                                                                                                                                                                                                                                                                                                                                                                                                                                           | 3 years of age   | 8 years of age |
| Atopic eczema                | At 3 and 8 years:<br>According to Williams' criteria [27] or as itching spots on typical locations that had come and gone for at least 6 months, with symptoms present in the last 12 months.                                                                                                                                                                                                                                                                                                                                                                                                                             | 7                | 5              |
| Asthma                       | At 3 years:<br>Persistent wheeze for $\geq 4$ weeks or $\geq 3$ episodes of wheezing, with the last episode after 2 years of age, combined with: a) $\geq 1$ minor criterion (symptoms between colds, eczema, allergic rhinoconjunctivitis or food allergy); or b) clinical response to inhaled glucocorticoids or leukotriene antagonists.<br>At 8 years:<br>Wheeze in the last year together with: a) reversal of bronchial obstruction by $\beta_2$ agonist ( $>12\%$ ); b) bronchial hyper-responsiveness upon methacholine challenge (PD 20 $<0.6$ mg); or c) ongoing asthma treatment with inhaled corticosteroids. | 4                | 4              |
| Allergic rhinoconjunctivitis | At 3 and 8 years:<br>Typical symptoms from eyes and/or nose in the last year when exposed to pollen or animal dander, together with a positive specific IgE-test or skin prick test to the relevant allergen(s).                                                                                                                                                                                                                                                                                                                                                                                                          | 1                | 3              |
| Food allergy                 | At 3 and 8 years:<br>An immediate or late-onset reaction (within the last 12 months) after ingestion of a specific food and improvement upon its elimination from the diet, together with any of the following: a) other signs of allergic disease; b) more than one organ system involved; or c) supported by positive allergy tests, biopsies, or challenge tests.                                                                                                                                                                                                                                                      | 2                | 0              |
| Allergy                      | One or more of the above diagnoses.                                                                                                                                                                                                                                                                                                                                                                                                                                                                                                                                                                                       | 11               | 10             |

Diagnostic criteria and data regarding allergy at three and eight years of age in the FARMFLORA cohort have previously been published [19, 20].

<https://doi.org/10.1371/journal.pone.0313078.t002>

## Statistical analyses

Comparisons in Table 1 were performed using Fisher's exact test. Bacterial variables are presented as colonization rates, median population counts in colonized children, and median ratio of anaerobe/facultative population counts. Statistical analyses of gut microbiota composition were performed using generalized estimating equations (GEE) to account for intra-individual correlations in repeated measures data. Continuous variables were analyzed by assuming a log-normal distribution, and binary variables using normal distribution with identity link. A Matern covariance matrix between repeated measures was used. Robust standard errors (HC3 method) were employed to account for violations against distributional assumptions. Time was modelled as a categorical variable, interacting with the group variable of interest to enable a separate evaluation at each specific time point. Results are presented as 1) differences in colonization rates (bacterium present/absent) between groups, and 2) fold changes in bacterial population counts in colonized children and anaerobic/facultative ratios between groups. Analyses were performed both unadjusted and adjusted for the following potential confounders, as applicable: pets in household, growing up on a farm, sex, breastfeeding (proportion of days of any breastfeeding from birth up to sampling), heredity (i.e. allergic parent(s), only considered in analyses regarding allergy). Farm living and pets were mutually adjusted for since farming families tended to keep pets more frequently, and farming [1, 2] and pets [11–13] are both associated with lower risk of allergy. Sex was adjusted for since a high proportion of the farmers' children were girls (Table 1), and boys are in many studies at higher risk for allergy [28]. Breastfeeding was controlled for since it strongly affects gut microbiota development [29], and is often believed to affect allergy development, although this may be controversial [30]. Heredity was adjusted for in the allergy analyses since it associated negatively with both farm living and pet keeping in the present study (Table 1), and is also a risk factor for allergy [31].



Overall trends in anaerobic/facultative ratios and population counts of different bacterial groups were analyzed as above but including only time (continuous) as explanatory variable.

All statistical tests were performed at the 5% significance level. Statistical analyses were performed by using SAS/STAT<sup>®</sup> Software, Version 9.4, of the SAS System for Windows (SAS Institute Inc. Cary, NC), and with SPSS Statistics version 29 (IBM Corporation, New York, USA).

The data analyzed in the current study have been published as an independent data publication in a data repository with restricted access [32].

## Results

### Gut colonization pattern

Fig 1 shows the pattern of gut colonization by major bacterial groups in the cohort as a whole (N = 65) between 1 week and 18 months of age, and summary statistics for changes over time (bacterial population counts and anaerobic/facultative ratio) are shown in S2 Table. Fig 1A shows colonization by major groups of facultative bacteria. Coagulase-negative staphylococci (CoNS) were the most common initial gut colonizers, being found in >90% of the infants on Day 3, followed by enterococci (70% colonized on Day 3, 95% by 2 months) and *Escherichia coli* (55% on Day 3, 90% by 4 months). Other *Enterobacteriaceae* members (denoted as “non-*E. coli*”) appeared later and were less prevalent (Fig 1A, S3 Table), as was *Staphylococcus aureus* (Fig 1A). Colonization by all these groups peaked during the first six months, and either remained constant or declined slightly thereafter.

The fecal population counts of the same groups of facultative bacteria in colonized infants are shown in Fig 1B. Counts were typically higher for Gram-negatives (*E. coli* and other *Enterobacteriaceae*, up to  $\sim 10^9$  CFU/g) than Gram-positives (*Enterococcus*, CoNS, *S. aureus*, up to  $\sim 10^6$ – $10^8$  CFU/g). However, for all facultatives, population counts declined significantly between 1 week and 18 months of age. In particular, counts of CoNS and *S. aureus* in colonized infants decreased sharply during the first months (Fig 1B, S2 Table).

Fig 1C shows colonization by major culturable anaerobic bacteria. *Bifidobacterium* spp. were detected in the gut of  $\sim 80\%$  of infants already in the first week after delivery and colonized most infants up to 18 months of age. *Clostridium* and *Bacteroides* spp. were slower to establish but colonized almost all infants by 6 and 12 months of age respectively (Fig 1C). *Lactobacillus* spp. were also common, colonizing >60% of infants by 1 month of age, although colonization rates did not increase further over time (Fig 1C). *C. difficile* was detected in  $\sim 30\%$  of infants and colonization rates peaked at 6–12 months of age.

Fig 1D shows the population counts of the same groups of anaerobic bacteria in colonized infants. *Bifidobacterium* spp. were the most abundant group of either anaerobic or facultative bacteria in the first 4 months ( $\sim 10^{10}$  CFU/g). However, they decreased slowly in abundance after 4 months of age, while *Bacteroides* counts reached  $\sim 10^{10}$  CFU/g by 4 months and remained high thereafter. *Lactobacillus* counts were lower, peaking at  $\sim 10^{8.5}$  CFU/g at 1–4 months, and declined sharply after 6 months of age (Fig 1D, S2 Table). *C. difficile* was present at  $10^{4-5}$  CFU/g feces in colonized infants.

The anaerobic fraction of the gut microbiota increased steadily over the first 18 months, indicated by an increase in the ratio of anaerobe to facultative bacterial counts from  $\sim 10$  at 1 week of age to  $\sim 500$  at 18 months of age (Fig 1E, S2 Table).

### Farm living and gut microbiota

Fig 2A–2C show comparisons between farm and control infants regarding gut microbiota characteristics. Significant differences between farming and non-farming infants after

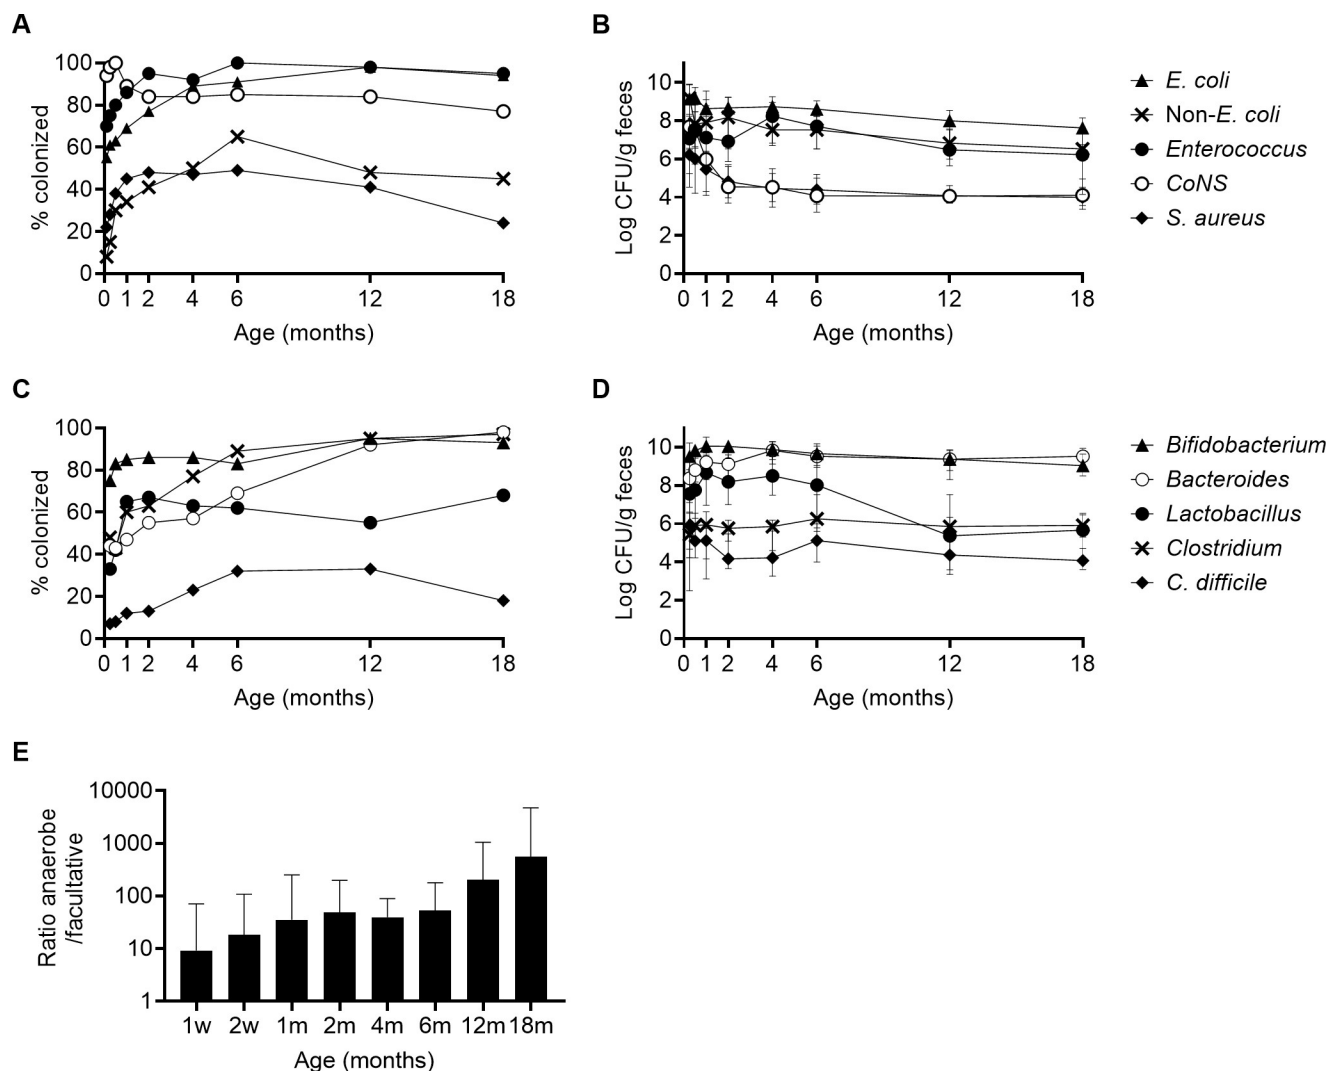

**Fig 1. Gut microbiota in the FARMFLORA cohort (N = 65).** (A) Colonization frequencies (%) of facultative bacteria and (B) their median fecal population counts (log CFU/g) in colonized children. (C) Colonization frequencies (%) of anaerobic bacteria and (D) their median fecal population counts in colonized children. (E) Median ratio of anaerobe to facultative fecal bacterial counts (ratio anaerobe/facultative) at different ages. Error bars represent the interquartile range.

<https://doi.org/10.1371/journal.pone.0313078.g001>

adjustment for pet ownership, which was more common on farms, and also for sex and breast-feeding (proportion of days of any breastfeeding up to sampling) are indicated by asterisks. In addition, details of both crude and adjusted associations are shown in [S4 Table](#).

After adjustment for covariates, farm infants had a seven-fold higher ratio of anaerobe to facultative bacterial counts than controls at one week of age ( $p = 0.020$ ) ([Fig 2A](#)), although not at later time points. Hence, when colonized by *E. coli*, farmers' infants had lower counts of this facultative bacterium than controls up to 4 months of age ( $p = 0.017$  at one week;  $p = 0.030$  at 1 month;  $p = 0.021$  at four months) ([Fig 2B](#)). Infants growing up on a farm were much less frequently colonized by *C. difficile* compared to controls at 12 months of age ( $p < 0.001$ ), although not at other timepoints ([Fig 2C](#)). Regarding *CoNS* colonization rate, farmers' infants were colonized more frequently at 4 months, but less frequently at 12 months of age ( $p = 0.029$  and  $p = 0.014$  respectively) ([S4 Table](#)). Further, when colonized by *Bifidobacterium* and

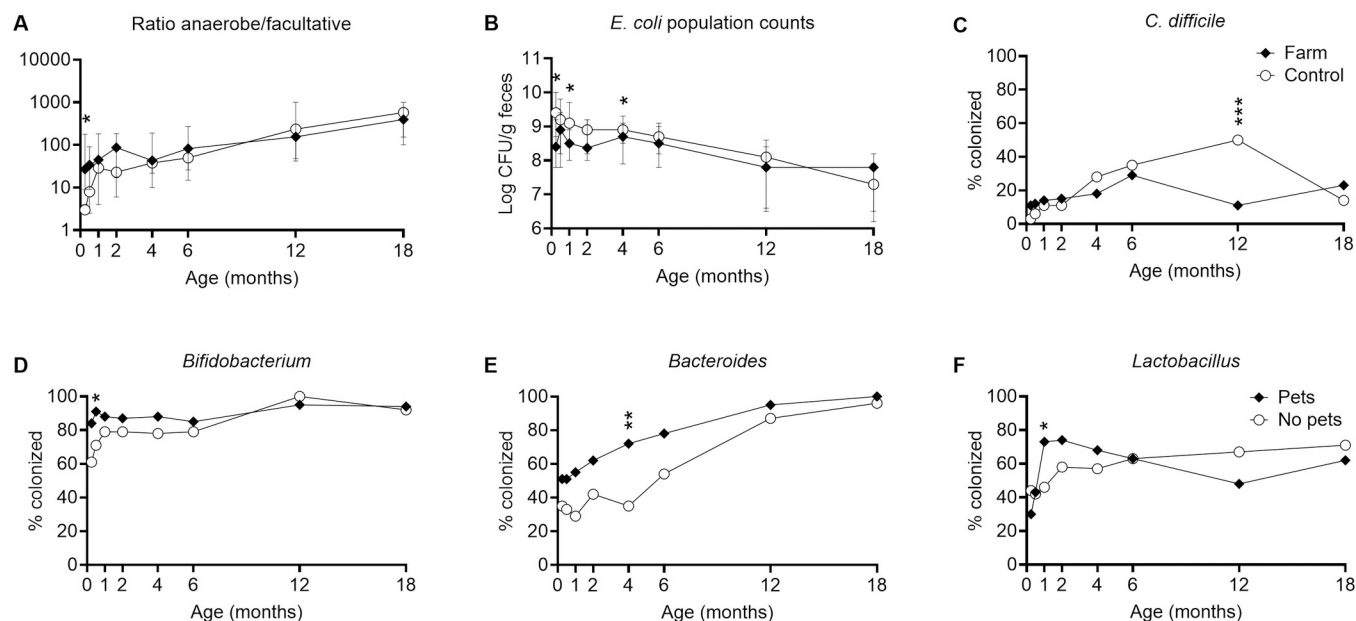

**Fig 2. Gut microbiota composition in (A–C) children growing up on a farm vs control children and (D–F) children growing up with pets vs no pets. A:** Ratio of anaerobe to facultative fecal bacterial counts (ratio anaerobe/facultative) **B:** *E. coli* population counts in colonized children. **C–F:** Colonization by *C. difficile*, *Bifidobacterium*, *Bacteroides* and *Lactobacillus* spp.. Points are medians (A–B) and proportions (C–F). Error bars represent the interquartile range. Asterisks show significant differences between groups after adjustment for confounders (farm living adjusted for pets in household, sex, breastfeeding; pets in household adjusted for farm living, sex, breastfeeding). \* $p < 0.05$ , \*\* $p < 0.01$ , \*\*\* $p < 0.001$ .

<https://doi.org/10.1371/journal.pone.0313078.g002>

*Lactobacillus*, population counts of these anaerobes were higher at 6 months of age in farmers' infants than in controls ( $p = 0.032$  and  $p = 0.027$  respectively) (S4 Table).

## Pet exposure and gut microbiota

Fig 2D–2F show colonization by different bacterial groups in infants with or without pets, with significant differences after adjustment for farm living, sex and breastfeeding indicated by asterisks.

After adjustment for covariates, infants with pets acquired *Bifidobacterium* and *Bacteroides* earlier than infants without pets ( $p = 0.022$  at 2 weeks and  $p = 0.002$  at 4 months respectively) (Fig 2D and 2E) and were also more frequently colonized by *Lactobacillus* in the first months ( $p = 0.045$  at 1 month) (Fig 2F). Details of these associations, and also data for other bacterial groups that differed significantly at any time point in either crude or adjusted analysis, are shown in S5 Table. The anaerobe/facultative ratio was non-significantly increased in infants from pet-keeping families at 1 week of age after adjustment ( $p = 0.088$ ) (S5 Table).

## Gut microbiota and allergy at three years of age

Next, we investigated the relationship between gut colonization in infancy and later allergy development. Allergy was evaluated at 3 and 8 years of age by clinical assessment (Table 2). Eleven children (17%) were allergic at 3 years of age. Fig 3 shows colonization by certain bacterial groups in infants who were allergic or non-allergic at this age. Significant differences between the groups after adjustment for growing up on a farm, pet exposure, sex, breastfeeding and heredity (allergic parent(s)) are indicated by asterisks.

After adjustment for covariates, allergy at three years of age was associated with delayed colonization by *Bacteroides* ( $p = 0.031$  at 1 week) and *Bifidobacterium* ( $p = 0.032$  at 2 months),



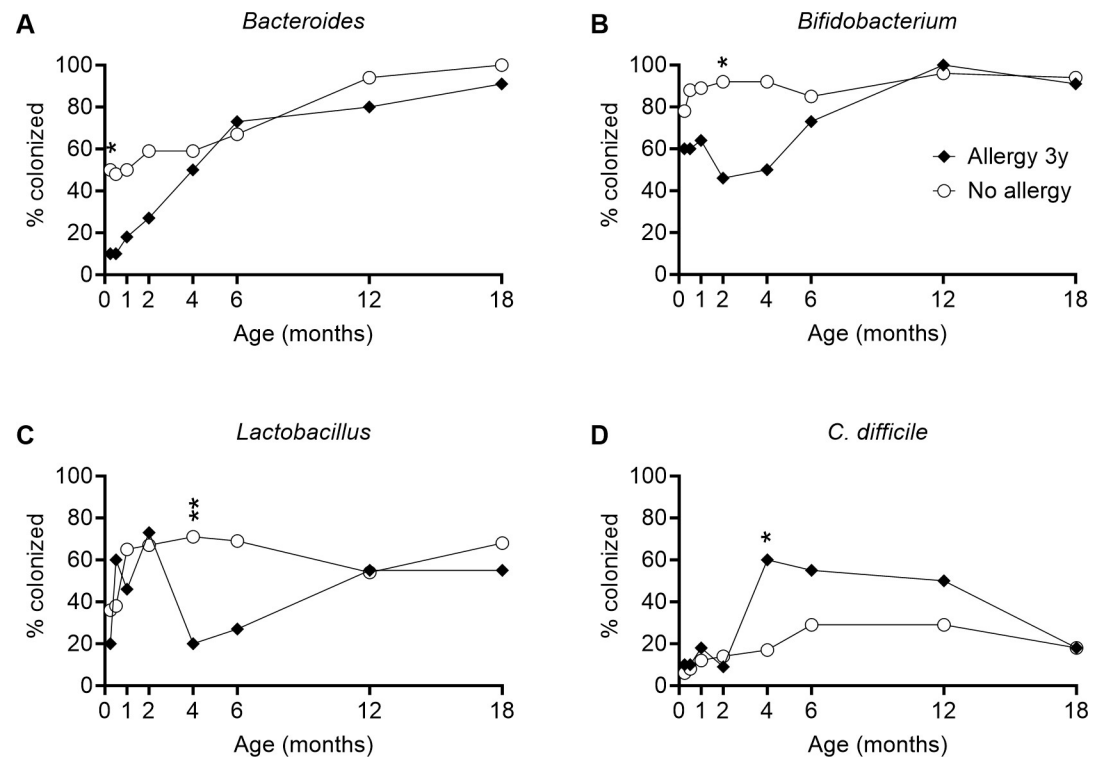

**Fig 3. Gut microbiota composition in relation to allergy at three years of age.** A–D: Colonization by *Bacteroides*, *Bifidobacterium*, *Lactobacillus* and *C. difficile*. Points are proportions of infants colonized (A–D). Asterisks show significant differences between groups after adjustment for confounders (pets in household, growing up on a farm, sex, breastfeeding, allergic parent(s)) \* $p < 0.05$ , \*\* $p < 0.01$ , \*\*\* $p < 0.001$ .

<https://doi.org/10.1371/journal.pone.0313078.g003>

and also with less frequent colonization by *Lactobacillus* ( $p = 0.002$  at 4 months) (Fig 3A–3C). Conversely, allergy at three years of age was associated with more frequent colonization by *C. difficile* ( $p = 0.043$  at 4 months) (Fig 3D). Allergy at three years of age was also associated with a lower anaerobe/facultative ratio in the first week samples, although not reaching statistical significance after adjustment ( $p = 0.094$ ), and with more frequent colonization by *Clostridium* spp. ( $p = 0.033$  at 4 months) and CoNS ( $p = 0.017$  and  $p = 0.036$  at 12 and 18 months of age respectively), and higher counts of *S. aureus* at 6 months ( $p = 0.039$ ). Detailed results for bacterial groups associated with allergy at three years of age, in both crude and adjusted analysis, are shown in S6 Table.

### Gut microbiota and allergy at eight years of age

Infant gut microbiota characteristics were even more clearly associated with allergy at eight years of age (Fig 4). Ten children (21%) were allergic at this age, of whom 5 were also allergic at 3 years, while 4 children who were allergic at 3 years no longer had an allergy.

After adjustment for the same factors as above, allergy at eight years of age was strongly associated with delayed colonization by *Bacteroides* ( $p < 0.0001$  at 1 week,  $p < 0.001$  at 2 weeks and  $p < 0.001$  at 1 month) and also with delayed acquisition of *Bifidobacterium* ( $p = 0.046$  at 1 week and  $p = 0.026$  at 2 weeks), as well as *Lactobacillus* through most of the first year (although not reaching statistical significance) (Fig 4A–4C). However, *Lactobacillus* colonization was increased in subsequently allergic children by 18 months of age ( $p = 0.017$ ) (Fig 4C). High anaerobe/facultative ratios at 1 and 2 weeks of age correlated negatively with allergy at 8 years of age ( $p = 0.007$  and  $0.047$  respectively) (Fig 4D). Allergy at eight years of age was also

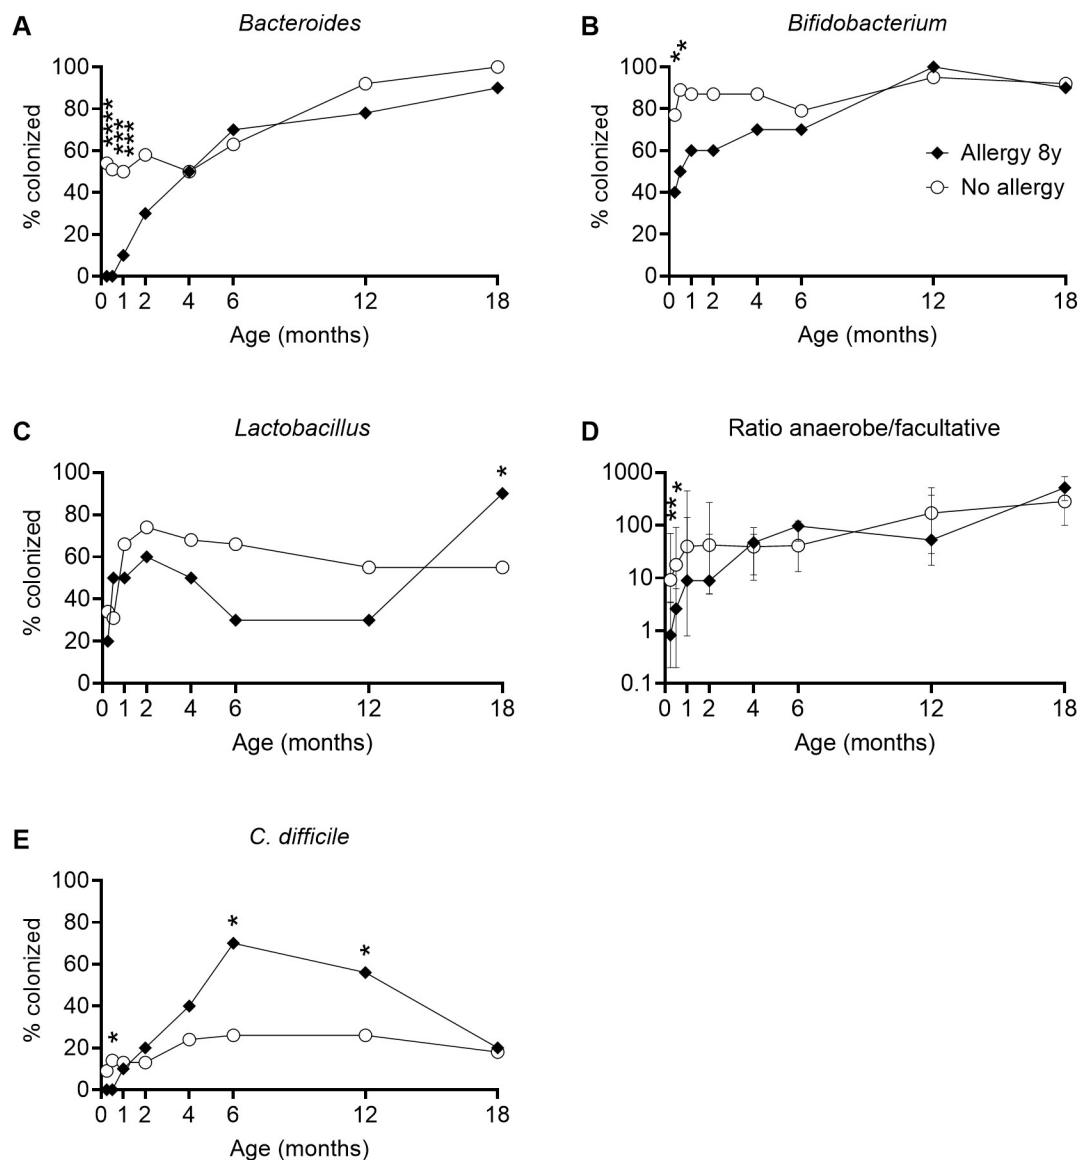

**Fig 4. Gut microbiota composition in relation to allergy at eight years of age.** A–C: Colonization by *Bacteroides*, *Bifidobacterium* and *Lactobacillus* spp. D: Ratio of anaerobe to facultative fecal bacterial counts (ratio anaerobe/facultative). E: Colonization by *C. difficile*. Points are proportions (A–C, E) and medians (D). Error bars represent the interquartile range. Asterisks show significant differences between groups after adjustment for confounders (pets in household, growing up on a farm, sex, breastfeeding, allergic parent(s)). \* $p < 0.05$ , \*\* $p < 0.01$ , \*\*\* $p < 0.001$ , \*\*\*\* $p < 0.0001$ .

<https://doi.org/10.1371/journal.pone.0313078.g004>

associated with less frequent initial colonization by *C. difficile* ( $p = 0.049$  at 2 weeks), but more frequent colonization by *C. difficile* at 6 and 12 months ( $p = 0.019$  and  $p = 0.049$  respectively) (Fig 4E). Detailed results for bacterial groups associated with allergy at three and eight years of age, in both crude and adjusted analysis, are shown in S7 Table.

## Discussion

In this prospective birth cohort study, we examined the effects of growing up on farms or with pets on the acquisition and development of the gut microbiota during early childhood, as well as associations between the gut microbiota and allergy at three and eight years of age. We

observed specific differences in colonization patterns in infants growing up on farms, compared to control infants from the same rural area, as well as specific gut microbiota markers of growing up with pets in the household. Finally, we found quite strong associations between the early colonization pattern and allergy, diagnosed at either 3 or 8 years of age.

While acquisition of the microbiota commences at birth, new species are successively established and the gut microbiota continues to develop and mature, i.e., becomes more diverse and increasingly dominated by obligate anaerobes, during infancy and early childhood [14]. In the present study, we used quantitative culturing of feces to map this process. We did not attempt to cover fully the anaerobic colonization pattern, instead focusing on the major early colonizers of infants [14], which are readily identified by culturing [33, 34]. The development of a complex and more mature gut microbiota was firstly evidenced by a gradual increase in the ratio of anaerobe to facultative bacterial counts in feces, from an average of 10 at 1 week of age to 500 at 18 months of age, which is in line with the results of previous studies [15, 33, 35]. Secondly, a mature anaerobic microbiota can suppress facultative bacteria and reduce their population counts [14, 17, 33] and we accordingly observed that fecal population counts of different facultative bacteria declined significantly between 1 week and 18 months of age in infants colonized by these bacteria. Thirdly, a more mature microbiota counteracts colonization by *C. difficile* [18], which is common in young infants. Hence, we observed a decreased carriage rate of *C. difficile* after 6–12 months of age.

Among the targeted anaerobes, *Bifidobacterium* spp. were clearly dominant first colonizers, followed by *Clostridium* spp., while *Bacteroides* spp. increased somewhat later and colonized all infants by the end of the first year, at which time their population counts equaled those of bifidobacteria. In addition, lactobacilli appeared early, but colonized only around 60% of the infants during the first year, and their population counts were also lower than for either *Bifidobacterium* or *Bacteroides*, as noted previously [14, 25]. We observed a steep drop in fecal *Lactobacillus* counts between 6 and 12 months of age in colonized infants, which occurred concurrently with the introduction of solid foods and cessation of breastfeeding [23]. This finding has been reported previously by us for other birth cohorts [25, 33], and may relate to major changes in the gut microbiota occurring during weaning.

We observed that certain gut microbiota markers were associated with growing up on a farm. These included a higher anaerobe/facultative ratio in the first week after delivery, lower population counts of *E. coli* in colonized infants during the first 4 months, and a markedly reduced carriage of *C. difficile* at 1 year of age. All these findings point to a more developed anaerobic gut microbiota in farmers' infants compared to controls, and were independent of sex, degree of breastfeeding and pet ownership. Other factors known to influence gut microbiota development were similar in children growing up on a farm and control children and could not explain the differences observed, including rates of caesarian delivery [33, 36], exposure to antibiotics [37] and birth order [33, 38]. Notably, two of the microbial markers above differed between farmers' and non-farmers' infants already in their first week, which suggests that growing up on a farm affects not only microbiota development towards the end of the first year, as previously shown [5, 10], but also much earlier. This is of interest given that priming of the immune system for tolerance likely starts very early in life, before the atopic march has begun [39]. To the best of our knowledge, this is the first study to demonstrate an association between growing up on a farm and gut microbiota development in the very first weeks of life.

We also observed associations between living with pets and the gut microbiota development of infants, independent of sex, degree of breastfeeding and growing up on a farm. Infants growing up in a home with pets acquired anaerobic bacteria such as bifidobacteria and *Bacteroides* earlier than other infants and were also more frequently colonized by lactobacilli in the

first months. A previous study observed that a larger proportion of pet-exposed infants harbored animal-specific *Bifidobacterium pseudolongum* in their gut at 1 month of age than unexposed controls [40]. However, other studies of the gut microbiota in infants in relation to pet exposure have shown inconsistent results [41, 42], and additional studies are needed to confirm our findings.

The most striking observations in the present study were the strong negative associations between being allergic at eight years of age and a high anaerobe/facultative ratio in feces during the first 1–2 weeks after delivery, early colonization with *Bacteroides* and *Bifidobacterium*, and decreased carriage of *C. difficile* at 6 and 12 months of age. Similar, but not equally strong associations were observed for allergy at 3 years of age. All these findings suggest that early colonization by obligate anaerobes is linked to protection from allergy development. The link between reduced *C. difficile* colonization and protection from subsequent allergy is in line with previous studies [43–45], while the apparent protective effect of early *Bacteroides* colonization is in line with some [5, 46, 47] but not all [48, 49] studies. Also, bifidobacterial colonization has been associated with protection in some studies [46, 50]. We have previously noted that early bifidobacterial colonization in the present cohort was associated with signs of both B- and T-cell maturation [51, 52].

Colonization by *Lactobacillus* at 4 months correlated negatively with allergy at three years of age and was also non-significantly lower during the first year in children who were allergic at eight years of age. Some other studies have also noted negative associations between *Lactobacillus* colonization and later allergy [53, 54].

As microbiota patterns that were correlated with reduced allergy development were evident already at 1 week of age, very early signals derived from the gut microbiota may be crucial for appropriate immune maturation and protection from subsequent allergy. In accordance, we and others have shown an association between high diversity of the very early gut microbiota and protection against eczema in early childhood [47, 55]. However, since the immune system is transiently activated every time a new bacterium settles in the gut [56], the continuous acquisition of new bacterial species and strains during infancy may provide the repetitive immune stimuli needed to fully promote the development of tolerance against harmless environmental antigens (“allergens”) [39]. This is supported by our findings of positive associations between *C. difficile* carriage at 4–12 months of age and subsequent allergy, since *C. difficile* carriage indicates gut microbiota immaturity, and also by the results of others linking an immature gut microbiota at one year of age to later allergy [5, 7–9]. A mature microbiota might also produce metabolites that favor tolerance development, e.g., short chain fatty acids. Accordingly, the farm children in FARMFLORA had higher fecal levels of iso-butyric, iso-valeric and valeric acid at three years of age than the rural controls [57]. Higher fecal levels of valeric acid at age 3 were associated with a low rate of eczema at age 8 in this cohort [57], and were a negative predictor of eczema and food allergy in another Swedish cohort [58], while fecal butyrate and butyrate-producing bacteria in the microbiota at 1 year of age were negatively associated with asthma development in the PASTURE study [5].

A limitation of the present study was the relatively small sample size which reduced the statistical power and precision of the analyses and may limit the generalizability of the findings. Also, due to the exploratory nature of this analysis we did not correct for multiple testing. Therefore, further studies are needed to validate our results. The strengths of the study were the thorough and structured clinical examinations for allergy at three and eight years of age, and the immediate culturing of fresh fecal samples at numerous time points.

Bacterial culturing has certain inherent advantages and drawbacks. Culturing has excellent sensitivity for early colonizing anaerobes such as bifidobacteria, lactobacilli, *Bacteroides*, members of *Clostridium sensu stricto* and *C. difficile*, as well as facultatives such as *E. coli*, *S. aureus*

and enterococci. It also allows quantification of the population counts of these bacterial groups. In contrast, traditional 16S rRNA gene sequencing only provides information on their relative abundance, although more recent studies may combine 16S rRNA gene sequencing with enumeration of bacterial cells or quantitative PCR to allow absolute quantification [59, 60]. Furthermore, culturing allows us to identify some key bacterial groups at the sub-genus or species level, while 16S rRNA gene sequencing only enables differentiation at the genus or even higher taxonomic levels [34, 61]. The major drawback of culturing is that the fastidious, highly oxygen-sensitive anaerobes which establish in the gut microbiota from weaning and onwards are missed, unless multiple and advanced culture systems are applied [61]. Therefore, we concentrated on the major early anaerobic colonizers that are readily detected by culture in this study.

It is well-established that growing up on a farm strongly protects against allergy development [1, 2], and accelerated gut microbiota maturation may be a contributing factor to this effect [5, 10]. Growing up with pets is also associated with protection from allergy [11–13], but the mechanism for this effect is unclear. In the present study, some gut microbiota markers that were linked to growing up on a farm and/or living with pets were also associated with reduced risk of subsequent allergy, including a higher anaerobic/facultative ratio, earlier colonization by *Bifidobacterium* and *Bacteroides* spp., and reduced colonization by *C. difficile*. However, the associations between early gut microbiota patterns and subsequent allergy were clearly stronger than those between farm living or pet exposure and composition of the gut microbiota. Thus, whereas the protective effect against allergy of farm living or contact with pets may, in part, be explained by effects on gut microbial colonization pattern, other factors are also likely to contribute.

## Supporting information

**S1 Table. Antibiotic treatment of the mothers during delivery and of the children during infancy.**

(DOCX)

**S2 Table. Linear trends in population counts of different bacterial groups in colonized children and ratio of anaerobe/facultative bacterial population counts from 1 week to 18 months of age.**

(DOCX)

**S3 Table. Colonization frequency and fecal population counts of *Enterobacteriaceae* species in colonized infants at different time-points.**

(DOCX)

**S4 Table. Bacterial variables associated with farm living, unadjusted and adjusted for pets in household, sex, and breastfeeding (proportion of days of any breastfeeding up to sampling).**

(DOCX)

**S5 Table. Bacterial variables associated with pets in household, unadjusted and adjusted for farm living, sex, and breastfeeding (proportion of days of any breastfeeding up to sampling).**

(DOCX)

**S6 Table. Bacterial variables associated with allergy at 3 years of age, unadjusted and adjusted for farm living, pet exposure, sex, breastfeeding (proportion of days of any**

**breastfeeding up to sampling) and heredity (allergic parent(s)).**  
(DOCX)

**S7 Table. Bacterial variables associated with allergy at eight years of age, unadjusted and adjusted for farm living, pet exposure, sex, breastfeeding (proportion of days of any breastfeeding up to sampling) and heredity (allergic parent(s)).**  
(DOCX)

**S1 Appendix. Culture media, growth conditions and identification methods used for the isolation and identification of bacterial groups that are commonly detected in the early gut microbiota.**  
(DOCX)

## Acknowledgments

We are grateful to the study nurses Anders Nordberg and Helen Andersson at Skaraborg Hospital, Skövde and Lidköping, respectively. We also thank Eva Ågren, Ingela Kinell and Jolanta Bonislawska for skillful technical laboratory assistance. Finally, we thank all the families who took part in the study.

## Author Contributions

**Conceptualization:** Bill Hesselmar, Anna Rudin, Agnes E. Wold, Ingegerd Adlerberth.

**Data curation:** Annika Ljung, Monica Gio-Batta, Bill Hesselmar.

**Formal analysis:** Henrik Imberg.

**Funding acquisition:** Agnes E. Wold, Ingegerd Adlerberth.

**Investigation:** Annika Ljung, Bill Hesselmar, Susanne Johansen, Carl-Johan Törnåge, Gunhild Lindhagen, Margareta Ceder.

**Methodology:** Bill Hesselmar, Agnes E. Wold, Ingegerd Adlerberth.

**Project administration:** Agnes E. Wold, Ingegerd Adlerberth.

**Supervision:** Bill Hesselmar, Agnes E. Wold, Ingegerd Adlerberth.

**Visualization:** Annika Ljung, Monica Gio-Batta, Henrik Imberg, Hardis Rabe, Forough L. Nowrouzian, Anna-Carin Lundell.

**Writing – original draft:** Annika Ljung.

**Writing – review & editing:** Annika Ljung, Monica Gio-Batta, Bill Hesselmar, Henrik Imberg, Hardis Rabe, Forough L. Nowrouzian, Susanne Johansen, Carl-Johan Törnåge, Gunhild Lindhagen, Margareta Ceder, Anna-Carin Lundell, Anna Rudin, Agnes E. Wold, Ingegerd Adlerberth.

## References

1. Riedler J, Braun-Fahrlander C, Eder W, Schreuer M, Waser M, Maisch S, et al. Exposure to farming in early life and development of asthma and allergy: a cross-sectional survey. *Lancet*. 2001; 358 (9288):1129–33. [https://doi.org/10.1016/S0140-6736\(01\)06252-3](https://doi.org/10.1016/S0140-6736(01)06252-3) PMID: 11597666
2. von Mutius E, Vercelli D. Farm living: effects on childhood asthma and allergy. *Nat Rev Immunol*. 2010; 10(12):861–8. Erratum in: *Nat Rev Immunol*. 2019 Sep;19(9):594 <https://doi.org/10.1038/nri2871> PMID: 21060319
3. Roy SR, Schiltz AM, Marotta A, Shen Y, Liu AH. Bacterial DNA in house and farm barn dust. *J Allergy Clin Immunol*. 2003; 112(3):571–8. [https://doi.org/10.1016/s0091-6749\(03\)01863-3](https://doi.org/10.1016/s0091-6749(03)01863-3) PMID: 13679817



4. Ostman S, Rask C, Wold AE, Hultkrantz S, Teleme E. Impaired regulatory T cell function in germ-free mice. *Eur J Immunol*. 2006; 36(9):2336–46. <https://doi.org/10.1002/eji.200535244> PMID: 16897813
5. Depner M, Taft DH, Kirjavainen PV, Kalanetra KM, Karvonen AM, Peschel S, et al. Maturation of the gut microbiome during the first year of life contributes to the protective farm effect on childhood asthma. *Nat Med*. 2020; 26(11):1766–75. <https://doi.org/10.1038/s41591-020-1095-x> PMID: 33139948
6. Dicksved J, Floistrup H, Bergstrom A, Rosenquist M, Pershagen G, Scheynius A, et al. Molecular fingerprinting of the fecal microbiota of children raised according to different lifestyles. *Appl Environ Microbiol*. 2007; 73(7):2284–9. <https://doi.org/10.1128/AEM.02223-06> PMID: 17293501
7. Hoskinson C, Dai DLY, Del Bel KL, Becker AB, Moraes TJ, Mandhane PJ, et al. Delayed gut microbiota maturation in the first year of life is a hallmark of pediatric allergic disease. *Nat Commun*. 2023; 14(1):4785. <https://doi.org/10.1038/s41467-023-40336-4> PMID: 37644001
8. Stokholm J, Blaser MJ, Thorsen J, Rasmussen MA, Waage J, Vinding RK, et al. Maturation of the gut microbiome and risk of asthma in childhood. *Nat Commun*. 2018; 9(1):141. Erratum in: *Nat Commun*. 2018 Feb 13;9(1):704 <https://doi.org/10.1038/s41467-017-02573-2> PMID: 29321519
9. Stokholm J, Thorsen J, Blaser MJ, Rasmussen MA, Hjelmsø M, Shah S, et al. Delivery mode and gut microbial changes correlate with an increased risk of childhood asthma. *Sci Transl Med*. 2020; 12(569). <https://doi.org/10.1126/scitranslmed.aax9929> PMID: 33177184
10. Pechlivanis S, Depner M, Kirjavainen PV, Roduit C, Taubel M, Frei R, et al. Continuous Rather Than Solely Early Farm Exposure Protects From Hay Fever Development. *J Allergy Clin Immunol Pract*. 2023; 11(2):591–601. <https://doi.org/10.1016/j.jaip.2022.10.035> PMID: 36356926
11. Hesselmar B, Aberg N, Aberg B, Eriksson B, Bjorksten B. Does early exposure to cat or dog protect against later allergy development? *Clin Exp Allergy*. 1999; 29(5):611–7. <https://doi.org/10.1046/j.1365-2222.1999.00534.x> PMID: 10231320
12. Hesselmar B, Hicke-Roberts A, Lundell AC, Adlerberth I, Rudin A, Saalman R, et al. Pet-keeping in early life reduces the risk of allergy in a dose-dependent fashion. *PLoS One*. 2018; 13(12):e0208472. <https://doi.org/10.1371/journal.pone.0208472> PMID: 30566481
13. Ojwang V, Nwaru BI, Takkinen HM, Kaila M, Niemela O, Haapala AM, et al. Early exposure to cats, dogs and farm animals and the risk of childhood asthma and allergy. *Pediatr Allergy Immunol*. 2020; 31(3):265–72. <https://doi.org/10.1111/pai.13186> PMID: 31829464
14. Adlerberth I, Wold AE. Establishment of the gut microbiota in Western infants. *Acta Paediatr*. 2009; 98(2):229–38. <https://doi.org/10.1111/j.1651-2227.2008.01060.x> PMID: 19143664
15. Ellis-Pegler RB, Crabtree C, Lambert HP. The faecal flora of children in the United Kingdom. *J Hyg (Lond)*. 1975; 75(1):135–42. <https://doi.org/10.1017/s0022217240004715x> PMID: 1056968
16. Sjöberg F, Nowrouzian F, Rangel I, Hannoun C, Moore E, Adlerberth I, et al. Comparison between terminal-restriction fragment length polymorphism (T-RFLP) and quantitative culture for analysis of infants' gut microbiota. *J Microbiol Methods*. 2013; 94(1):37–46. <https://doi.org/10.1016/j.mimet.2013.04.002> PMID: 23583598
17. Freter R, Abrams GD. Function of various intestinal bacteria in converting germfree mice to the normal state. *Infect Immun*. 1972; 6(2):119–26. <https://doi.org/10.1128/iai.6.2.119-126.1972> PMID: 4631910
18. Jangi S, Lamont JT. Asymptomatic colonization by *Clostridium difficile* in infants: implications for disease in later life. *J Pediatr Gastroenterol Nutr*. 2010; 51(1):2–7. <https://doi.org/10.1097/MPG.0b013e3181d29767> PMID: 20512057
19. Lundell AC, Johansen S, Adlerberth I, Wold AE, Hesselmar B, Rudin A. High proportion of CD5+ B cells in infants predicts development of allergic disease. *J Immunol*. 2014; 193(2):510–8. <https://doi.org/10.4049/jimmunol.1302990> PMID: 24928995
20. Strombeck A, Nordstrom I, Andersson K, Andersson H, Johansen S, Maglio C, et al. Allergic disease in 8-year-old children is preceded by delayed B cell maturation. *Clin Exp Allergy*. 2017. <https://doi.org/10.1111/cea.12922> PMID: 28295779
21. Adlerberth I, Lindberg E, Aberg N, Hesselmar B, Saalman R, Strannegard IL, et al. Reduced enterobacterial and increased staphylococcal colonization of the infantile bowel: an effect of hygienic lifestyle? *Pediatr Res*. 2006; 59(1):96–101. <https://doi.org/10.1203/01.pdr.0000191137.12774.b2> PMID: 16380405
22. Jokela R, Korpela K, Jian C, Dikareva E, Nikkonen A, Saisto T, et al. Quantitative insights into effects of intrapartum antibiotics and birth mode on infant gut microbiota in relation to well-being during the first year of life. *Gut Microbes*. 2022; 14(1):2095775. <https://doi.org/10.1080/19490976.2022.2095775> PMID: 36174236
23. Jonsson K, Barman M, Brekke HK, Hesselmar B, Johansen S, Sandberg AS, et al. Late introduction of fish and eggs is associated with increased risk of allergy development—results from the FARMFLORA

- birth cohort. *Food Nutr Res*. 2017; 61(1):1393306. <https://doi.org/10.1080/16546628.2017.1393306> PMID: 29151834
24. Nowrouzian FL, Ljung A, Hesselmar B, Nilsson S, Adlerberth I, Wold AE. Bacterial carriage of genes encoding fibronectin-binding proteins is associated with long-term persistence of *Staphylococcus aureus* in the nasal and gut microbiota of infants. *Appl Environ Microbiol*. 2021; AEM0067121. <https://doi.org/10.1128/AEM.00671-21> PMID: 34020939
  25. Ahrne S, Lonnermark E, Wold AE, Aberg N, Hesselmar B, Saalman R, et al. Lactobacilli in the intestinal microbiota of Swedish infants. *Microbes Infect*. 2005; 7(11–12):1256–62. <https://doi.org/10.1016/j.micinf.2005.04.011> PMID: 16002310
  26. Penders J, Vink C, Driessen C, London N, Thijs C, Stobberingh EE. Quantification of *Bifidobacterium* spp., *Escherichia coli* and *Clostridium difficile* in faecal samples of breast-fed and formula-fed infants by real-time PCR. *FEMS Microbiol Lett*. 2005; 243(1):141–7. <https://doi.org/10.1016/j.femsle.2004.11.052> PMID: 15668012
  27. Williams HC. Diagnostic criteria for atopic dermatitis. *Lancet*. 1996; 348(9038):1391–2.
  28. Hohmann C, Keller T, Gehring U, Wijga A, Standl M, Kull I, et al. Sex-specific incidence of asthma, rhinitis and respiratory multimorbidity before and after puberty onset: individual participant meta-analysis of five birth cohorts collaborating in MeDALL. *BMJ Open Respir Res*. 2019; 6(1):e000460. <https://doi.org/10.1136/bmjresp-2019-000460> PMID: 31673365
  29. Galazzo G, van Best N, Bervoets L, Dapaah IO, Savelkoul PH, Hornef MW, et al. Development of the Microbiota and Associations With Birth Mode, Diet, and Atopic Disorders in a Longitudinal Analysis of Stool Samples, Collected From Infancy Through Early Childhood. *Gastroenterology*. 2020; 158(6):1584–96. <https://doi.org/10.1053/j.gastro.2020.01.024> PMID: 31958431
  30. Ferrante G, Carta M, Montante C, Notarbartolo V, Corsello G, Giuffrè M. Current Insights on Early Life Nutrition and Prevention of Allergy. *Front Pediatr*. 2020; 8:448. <https://doi.org/10.3389/fped.2020.00448> PMID: 32850557
  31. Kjellman NI. Atopic disease in seven-year-old children. Incidence in relation to family history. *Acta Paediatr Scand*. 1977; 66(4):465–71. <https://doi.org/10.1111/j.1651-2227.1977.tb07928.x> PMID: 899762
  32. Adlerberth I, Wold A, Hesselmar B. Data for: Gut microbiota markers in early childhood are linked to farm living, pets in household and allergy. University of Gothenburg; 2024. <https://doi.org/10.5878/j3eq-7y09>
  33. Adlerberth I, Strachan DP, Matricardi PM, Ahrne S, Orfei L, Aberg N, et al. Gut microbiota and development of atopic eczema in 3 European birth cohorts. *J Allergy Clin Immunol*. 2007; 120(2):343–50. <https://doi.org/10.1016/j.jaci.2007.05.018> PMID: 17604093
  34. Sjöberg F, Nookaew I, Yazdanshenas S, Gio-Batta M, Adlerberth I, Wold AE. Are all faecal bacteria detected with equal efficiency? A study using next-generation sequencing and quantitative culture of infants' faecal samples. *J Microbiol Methods*. 2020; 177:106018. <https://doi.org/10.1016/j.mimet.2020.106018> PMID: 32795633
  35. Nagpal R, Tsuji H, Takahashi T, Nomoto K, Kawashima K, Nagata S, et al. Ontogenesis of the Gut Microbiota Composition in Healthy, Full-Term, Vaginally Born and Breast-Fed Infants over the First 3 Years of Life: A Quantitative Bird's-Eye View. *Front Microbiol*. 2017; 8:1388. <https://doi.org/10.3389/fmicb.2017.01388> PMID: 28785253
  36. Dominguez-Bello MG, Costello EK, Contreras M, Magris M, Hidalgo G, Fierer N, et al. Delivery mode shapes the acquisition and structure of the initial microbiota across multiple body habitats in newborns. *Proc Natl Acad Sci U S A*. 2010; 107(26):11971–5. <https://doi.org/10.1073/pnas.1002601107> PMID: 20566857
  37. Dierikx TH, Visser DH, Benninga MA, van Kaam A, de Boer NKH, de Vries R, et al. The influence of pre-natal and intrapartum antibiotics on intestinal microbiota colonisation in infants: A systematic review. *J Infect*. 2020; 81(2):190–204. <https://doi.org/10.1016/j.jinf.2020.05.002> PMID: 32389786
  38. Penders J, Thijs C, Vink C, Stelma FF, Snijders B, Kummeling I, et al. Factors influencing the composition of the intestinal microbiota in early infancy. *Pediatrics*. 2006; 118(2):511–21. <https://doi.org/10.1542/peds.2005-2824> PMID: 16882802
  39. Petersen C, Turvey SE. Can we prevent allergic disease? Understanding the links between the early life microbiome and allergic diseases of childhood. *Curr Opin Pediatr*. 2020; 32(6):790–7. <https://doi.org/10.1097/MOP.0000000000000956> PMID: 33027216
  40. Nermes M, Endo A, Aarnio J, Salminen S, Isolauri E. Furry pets modulate gut microbiota composition in infants at risk for allergic disease. *J Allergy Clin Immunol*. 2015; 136(6):1688–90 e1. <https://doi.org/10.1016/j.jaci.2015.07.029> PMID: 26343452
  41. Tun HM, Konya T, Takaro TK, Brook JR, Chari R, Field CJ, et al. Exposure to household furry pets influences the gut microbiota of infant at 3–4 months following various birth scenarios. *Microbiome*. 2017; 5(1):40.

42. Azad MB, Konya T, Maughan H, Guttman DS, Field CJ, Sears MR, et al. Infant gut microbiota and the hygiene hypothesis of allergic disease: impact of household pets and siblings on microbiota composition and diversity. *Allergy Asthma Clin Immunol*. 2013; 9(1):15. <https://doi.org/10.1186/1710-1492-9-15> PMID: 23607879
43. Penders J, Thijs C, van den Brandt PA, Kummeling I, Snijders B, Stelma F, et al. Gut microbiota composition and development of atopic manifestations in infancy: the KOALA Birth Cohort Study. *Gut*. 2007; 56(5):661–7. <https://doi.org/10.1136/gut.2006.100164> PMID: 17047098
44. Lee SH, Gong YN, Ryoo E. Clostridium difficile colonization and/or infection during infancy and the risk of childhood allergic diseases. *Korean J Pediatr*. 2017; 60(5):145–50. <https://doi.org/10.3345/kjp.2017.60.5.145> PMID: 28592977
45. van Nimwegen FA, Penders J, Stobberingh EE, Postma DS, Koppelman GH, Kerkhof M, et al. Mode and place of delivery, gastrointestinal microbiota, and their influence on asthma and atopy. *J Allergy Clin Immunol*. 2011; 128(5):948–55 e1-3. <https://doi.org/10.1016/j.jaci.2011.07.027> PMID: 21872915
46. Bjorksten B, Sepp E, Julge K, Voor T, Mikelsaar M. Allergy development and the intestinal microflora during the first year of life. *J Allergy Clin Immunol*. 2001; 108(4):516–20. <https://doi.org/10.1067/mai.2001.118130> PMID: 11590374
47. Abrahamsson TR, Jakobsson HE, Andersson AF, Bjorksten B, Engstrand L, Jenmalm MC. Low diversity of the gut microbiota in infants with atopic eczema. *J Allergy Clin Immunol*. 2012; 129(2):434–40, 40 e1-2. <https://doi.org/10.1016/j.jaci.2011.10.025> PMID: 22153774
48. Vael C, Nelen V, Verhulst SL, Goossens H, Desager KN. Early intestinal Bacteroides fragilis colonisation and development of asthma. *BMC Pulm Med*. 2008; 8:19. <https://doi.org/10.1186/1471-2466-8-19> PMID: 18822123
49. Songjinda P, Nakayama J, Tateyama A, Tanaka S, Tsubouchi M, Kiyohara C, et al. Differences in developing intestinal microbiota between allergic and non-allergic infants: a pilot study in Japan. *Biosci Biotechnol Biochem*. 2007; 71(9):2338–42. <https://doi.org/10.1271/bbb.70154> PMID: 17827672
50. Kalliomaki M, Kirjavainen P, Eerola E, Kero P, Salminen S, Isolauri E. Distinct patterns of neonatal gut microflora in infants in whom atopy was and was not developing. *J Allergy Clin Immunol*. 2001; 107(1):129–34. <https://doi.org/10.1067/mai.2001.111237> PMID: 11150002
51. Lundell AC, Bjornsson V, Ljung A, Ceder M, Johansen S, Lindhagen G, et al. Infant B cell memory differentiation and early gut bacterial colonization. *J Immunol*. 2012; 188(9):4315–22. <https://doi.org/10.4049/jimmunol.1103223> PMID: 22490441
52. Rabe H, Lundell A-C, Sjöberg F, Ljung A, Strömbeck A, Gio-Batta M, et al. Neonatal gut colonization by Bifidobacterium is associated with higher childhood cytokine responses. *Gut Microbes*. 2020; 12(1):1–14. <https://doi.org/10.1080/19490976.2020.1847628> PMID: 33274676
53. Kalliomaki M, Salminen S, Poussa T, Isolauri E. Probiotics during the first 7 years of life: a cumulative risk reduction of eczema in a randomized, placebo-controlled trial. *J Allergy Clin Immunol*. 2007; 119(4):1019–21. <https://doi.org/10.1016/j.jaci.2006.12.608> PMID: 17289135
54. Johansson MA, Sjogren YM, Persson JO, Nilsson C, Sverremark-Ekstrom E. Early colonization with a group of Lactobacilli decreases the risk for allergy at five years of age despite allergic heredity. *PLoS One*. 2011; 6(8):e23031. <https://doi.org/10.1371/journal.pone.0023031> PMID: 21829685
55. Wang M, Karlsson C, Olsson C, Adlerberth I, Wold AE, Strachan DP, et al. Reduced diversity in the early fecal microbiota of infants with atopic eczema. *J Allergy Clin Immunol*. 2008; 121(1):129–34. <https://doi.org/10.1016/j.jaci.2007.09.011> PMID: 18028995
56. Shroff KE, Meslin K, Cebra JJ. Commensal enteric bacteria engender a self-limiting humoral mucosal immune response while permanently colonizing the gut. *Infect Immun*. 1995; 63(10):3904–13. <https://doi.org/10.1128/iai.63.10.3904-3913.1995> PMID: 7558298
57. Gio-Batta M, Sjöberg F, Jonsson K, Barman M, Lundell AC, Adlerberth I, et al. Fecal short chain fatty acids in children living on farms and a link between valeric acid and protection from eczema. *Sci Rep*. 2020; 10(1):22449. <https://doi.org/10.1038/s41598-020-79737-6> PMID: 33384449
58. Gio-Batta M, Spetz K, Barman M, Braback L, Norin E, Bjorksten B, et al. Low Concentration of Fecal Valeric Acid at 1 Year of Age Is Linked with Eczema and Food Allergy at 13 Years of Age: Findings from a Swedish Birth Cohort. *Int Arch Allergy Immunol*. 2021:1–11. <https://doi.org/10.1159/000520149> PMID: 34839288
59. Vandeputte D, Kathagen G, D'Hoe K, Vieira-Silva S, Valles-Colomer M, Sabino J, et al. Quantitative microbiome profiling links gut community variation to microbial load. *Nature*. 2017; 551(7681):507–11. <https://doi.org/10.1038/nature24460> PMID: 29143816
60. Jian C, Luukkonen P, Yki-Jarvinen H, Salonen A, Korpela K. Quantitative PCR provides a simple and accessible method for quantitative microbiota profiling. *PLoS One*. 2020; 15(1):e0227285. <https://doi.org/10.1371/journal.pone.0227285> PMID: 31940382

61. Lagier JC, Dubourg G, Million M, Cadoret F, Bilen M, Fenollar F, et al. Culturing the human microbiota and culturomics. *Nat Rev Microbiol.* 2018; 16:540–50. <https://doi.org/10.1038/s41579-018-0041-0>  
PMID: [29937540](https://pubmed.ncbi.nlm.nih.gov/29937540/)
